# Supplementary material for: Fano resonances in three-dimensional dual cut-wire pairs
Source: Royal Society of Chemistry journal article supplement (doi:10.1039/c3nr06547b), 2014-01-01
Supplement: c3nr06547b1.pdf [file c3nr06547b1.pdf]

## Supporting Information

# Fano Resonances in Three-Dimensional Dual Cut-wire Pairs

Xingzhan Wei,<sup>1\*</sup> Matteo Altissimo,<sup>2</sup> Timothy J. Davis,<sup>2,3</sup> and Paul Mulvaney<sup>1\*</sup>

<sup>1</sup>School of Chemistry and Bio21 Institute, University of Melbourne, Parkville, Victoria, 3010, Australia

<sup>2</sup>Melbourne Centre for Nanofabrication, ANFF, 151 Wellington Road, Clayton, Victoria 3168, Australia

<sup>3</sup>CSIRO, Materials Science and Engineering, Private Bag 33, Clayton, VIC, 3168, Australia

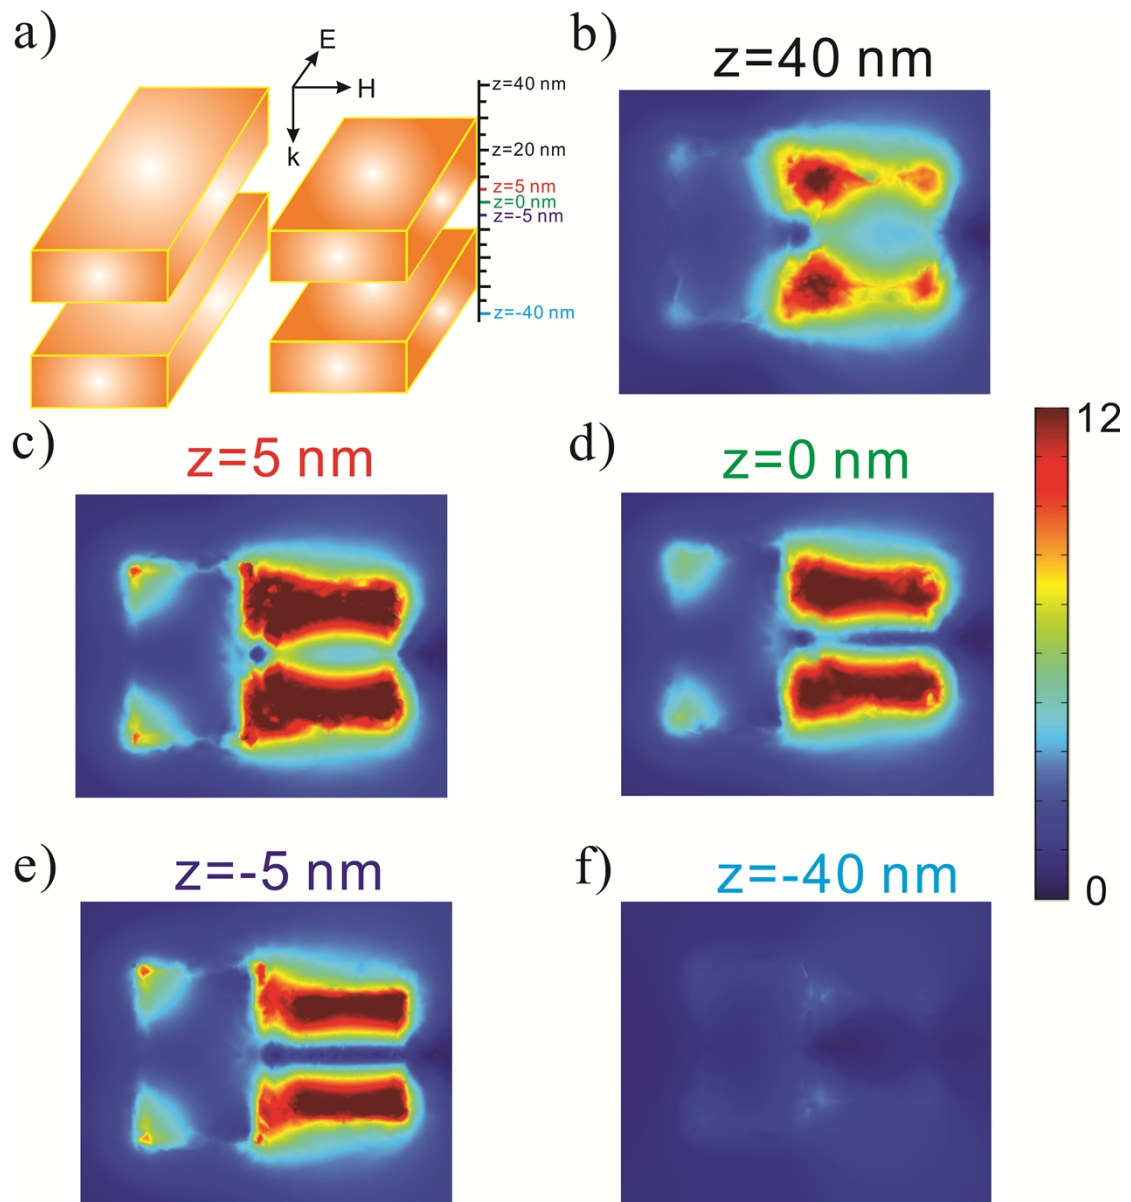

**Figure S1:** (a) Schematic view of the Fano resonance system, and description of the vertical coordinate values; (b)-(f) Electric field intensity enhancement at different vertical planes,  $z = 40$  nm, 5 nm, 0 nm, -5 nm and -40 nm.

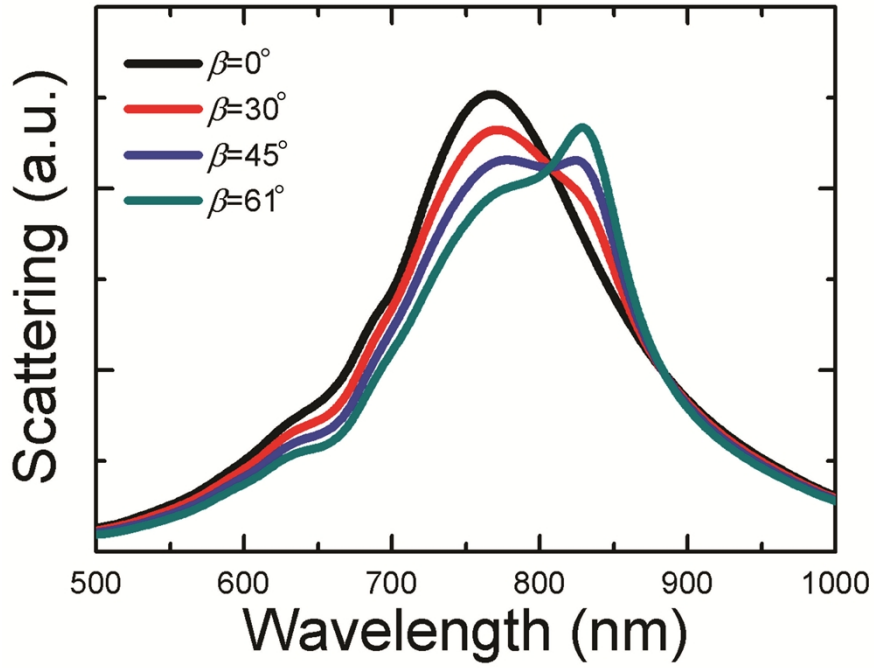

**Figure S2:** Modeled scattering spectra versus incidence angle  $\beta$ . Note the dip developing in the spectra at around 805 nm as the angle increases.

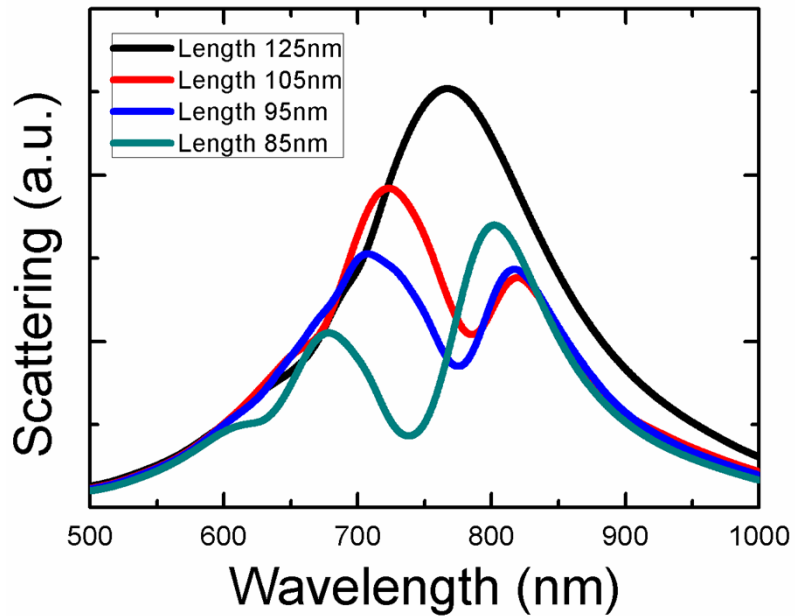

**Figure S3:** Modeled scattering spectra as a function of cut-wire length ( $l_2$ ) under normal illumination condition.
